# Supplementary material for: Structural Predictions of the SNX-RGS Proteins Suggest They Belong to a New Class of Lipid Transfer Proteins
Source: PubMed Central journal article supplement (PMC8864675; doi:10.3389/fcell.2022.826688), 2022-02-03
Supplement: Datasheet1.pdf [file Datasheet1.pdf]

# **Supplementary Information for**

**Structural predictions of the SNX-RGS proteins suggest they belong to a new class of lipid transfer proteins**

**Blessy Paul, Saroja Weeratunga, Vikas A. Tillu, Hanaa Hariri, W. Mike Henne and Brett M. Collins**

**[b.collins@imb.uq.edu.au](mailto:b.collins@imb.uq.edu.au)**

## Supplementary Figures

### Figure S1. Crystal structure of the SNX25 RGS domain.

(A) Crystal structure of the wild-type human SNX25 RGS domain. (B) Alignment of the two chains in the asymmetric unit of wild-type SNX25 RGS domain. (C) The position of the non-native disulfide bond formed between adjacent chains in the crystal lattice. This causes the change in orientation of the  $\alpha 5$  helix. (D) Crystal structure of the SNX25(C526A) mutant protein. (E) Alignment of the two chains in the asymmetric unit of SNX25(C526A) RGS domain. (F) Structural alignment of the wild-type and C526A SNX25 RGS domain structures.

### Figure S2. Comparison of experimental SNX-RGS structures with their AlphaFold2 predictions.

(A) Crystal structure of the human SNX25(C326A) RGS domain (red, this study) aligned with the AlphaFold2 prediction (light blue). (B) Crystal structures of human SNX14 PX domain (green, PDB 4PQP; magenta, 4PQO) with the AlphaFold2 prediction (blue). (C) Crystal structure of mouse SNX19 PX domain (pink, PDB 4P2I) aligned with the AlphaFold2 prediction (blue). (D) NMR structure of human SNX25 PX domain (cyan, PDB 4PQP) aligned with the AlphaFold2 prediction (blue).

### Figure S3. Additional details of the SNX13 predicted full length structure.

(A) AlphaFold2 prediction of full-length human SNX13 protein with individual domains coloured as in Fig. 2B with the TM domain and linker regions (grey), PXA domain (green), RGS domain (light blue), PX domain (blue), and PXC domain (orange). (B) AlphaFold2 prediction of full-length human SNX13 protein coloured according to the pLDDT score. (C) The AlphaFold2 predictions of human, mouse and zebrafish SNX13 proteins were aligned based on the core PXA-PXC structure.

### Figure S4. AlphaFold2 prediction of full-length human SNX25 protein.

(A) Top ranked structure of full length human SNX25<sup>1</sup> (Uniprot ID A0A494C0S0) predicted by ColabFold coloured according to pLDDT score. (B) Top ranked structure of human SNX25 predicted by ColabFold coloured according to the indicated domains. (C) Alignment based on the core PXA-PXC structure of the five structural predictions of human SNX25 from ColabFold.

### Figure S5. Conserved hydrophobic cavities in all human, yeast and fly PXA-PXC domains.

Structures of indicated PXA-PXC domains in ribbon (left) surface coloured by hydrophobicity, and sequence conservation. A region in SNX14 is highlighted that when deleted prevents LD recruitment<sup>2</sup>. Far right panels display accessible cavities (red surface representation) in the proteins identified with POCASA<sup>3</sup> and the volume ( $\text{\AA}^3$ ) of the largest continuous cavity is indicated. The five bottom structures are examples of other lipid transfer proteins bound to different lipids, demonstrating how similar kinds of conserved hydrophobic pockets can serve as lipid binding cavities and provided for comparison. Extended synaptotagmin 2 (E-Syt2) is in complex with a phosphatidylethanolamine lipid

and Triton-X100 detergent molecule (PDB 4P42) <sup>4</sup>. Cholesteryl ester transfer protein (CETP) is in complex with two cholesteryl esters and two phosphatidylcholine lipids (PDB 2OBP) <sup>5</sup>. Glycolipid transfer protein (GLTP) is in complex with N-oleoyl-glucosylceramide (PDB 3S0K) <sup>6</sup>. Phosphatidylcholine transfer protein (PC-TP) is shown in complex with a phosphatidylcholine molecule (PDB 1LN2) <sup>7</sup>. Human OSBP-related protein 1 (ORP1) is shown bound to phosphatidylinositol(4,5)P<sub>2</sub> (PDB 5ZM6)<sup>8</sup>

**Figure S6. AlphaFold2 predicted structure of Lec1/Ypr097w.**

(A) Plot of the Predicted Alignment Error (PAE) from the AlphaFold2 database. There is a strong degree of correlation between the N-terminal PXYn and C-terminal PXYc domains suggesting these two domains are physically associated. (B) The predicted structure of Lec1/Ypr097w from *S. cerevisiae* coloured according to the pLDDT score. (C) Overlay of the PXY proteins from *S. cerevisiae*, *S. pombe* and *C. albicans*.

**Figure S7. AlphaFold2 predicted structure of PXY domain proteins found in *S. pombe*, *C. thermophilum* and *D. dictyostelium*.**

(A) Structural prediction of *S. pombe* Lec1/Ypr092w orthologue C1450.12. (B) Structural prediction of *S. pombe* Lec1/Ypr092w homologue C663.15c. (C) Structural prediction of *C. thermophilum* Lec1/Ypr092w orthologue EGS19171. (D) Structural prediction of *C. thermophilum* Lec1/Ypr092w homologue EGS20008. (E) Structural prediction of *D. discoideum* DUF3818 domain-containing protein.

**Table S1. Statistics for X-ray crystallographic data collection and structure refinement<sup>a</sup>**

|                                     | Human SNX25 RGS domain     | Human SNX25 RGS domain (C526A)   |
|-------------------------------------|----------------------------|----------------------------------|
| <b>Wavelength (Å)</b>               | 1.006                      | 0.95364                          |
| <b>Resolution range (Å)</b>         | 45.84 -2.4 (2.486-2.4)     | 48.25-2.42 (2.52-2.42)           |
| <b>Space group</b>                  | P 1 21 1                   | P 1 21 1                         |
| <b>Unit cell</b>                    | 48.6 57.1 67.0 90 109.5 90 | 44.0 75.9 51.1 90.00 109.3 90.00 |
| <b>Total reflections</b>            | 47931 (3290)               | 81322 (7264)                     |
| <b>Unique reflections</b>           | 13200 (1003)               | 11898 (1111)                     |
| <b>Multiplicity</b>                 | 3.6 (3.1)                  | 6.8 (6.5)                        |
| <b>Completeness (%)</b>             | 96.5 (74.1)                | 97.9 (89.2)                      |
| <b>Mean I/sigma(I)</b>              | 11.9 (2.1)                 | 7.2 (1.4)                        |
| <b>R-merge</b>                      | 0.065 (0.506)              | 0.171 (0.976)                    |
| <b>R-meas</b>                       | 0.089 (0.690)              | 0.185 (1.062)                    |
| <b>R-pim</b>                        | 0.061 (0.467)              | 0.070 (0.410)                    |
| <b>CC1/2</b>                        | 0.998 (0.718)              | 0.992 (0.631)                    |
| <b>R-work</b>                       | 0.2164 (0.2984)            | 0.2108 (0.3258)                  |
| <b>R-free</b>                       | 0.2421 (0.2906)            | 0.2497 (0.4051)                  |
| <b>Number of non-hydrogen atoms</b> | 2157                       | 2026                             |
| <b>macromolecules</b>               | 2080                       | 1991                             |
| <b>solvent</b>                      | 77                         | 30                               |
| <b>RMS(bonds)</b>                   | 0.003                      | 0.007                            |
| <b>RMS(angles)</b>                  | 0.55                       | 0.87                             |
| <b>Ramachandran favored (%)</b>     | 97.08                      | 97.38                            |
| <b>Ramachandran allowed (%)</b>     | 2.92                       | 2.62                             |
| <b>Ramachandran outliers (%)</b>    | 0.00                       | 0.00                             |
| <b>Clashscore</b>                   | 2.66                       | 6.07                             |
| <b>Average B-factor</b>             | 51.51                      | 52.68                            |
| <b>macromolecules</b>               | 51.69                      | 52.76                            |
| <b>solvent</b>                      | 46.74                      | 46.51                            |
| <b>PDB ID</b>                       | 7SR1                       | 7SR2                             |

a. Statistics for the highest-resolution shell are shown in parentheses.

**Table S2. Homologues of the PXA-PXC and PXYn-PXYc domain-containing proteins based on structural similarity in the AlphaFold2 database<sup>a</sup>.**

|                                                             | PXA-PXC domains                                                         | Uniprot ID                                                    | PXYn-PXYc domains                              | Uniprot ID                             |
|-------------------------------------------------------------|-------------------------------------------------------------------------|---------------------------------------------------------------|------------------------------------------------|----------------------------------------|
| <i>H. sapiens</i><br>(human)                                | SNX13<br>SNX14<br>SNX19<br>SNX25<br>SNX25 full length                   | Q9Y5W8<br>Q9Y5W7<br>Q92543<br>Q9H3E2<br>A0A494C0S0            | -                                              | -                                      |
| <i>D. melanogaster</i><br>(fly)                             | Snz                                                                     | Q9W3N0                                                        | -                                              | -                                      |
| <i>C. elegans</i><br>(worm)                                 | snx-14<br>snx-13                                                        | G5EF63<br>Q9U2U6                                              | -                                              | -                                      |
| <i>A. thaliana</i><br>(plant)                               | At1g15240<br>At2g15900                                                  | F4HZJ6<br>F4IJE1                                              | -                                              | -                                      |
| <i>D. discoideum</i><br>(amoeba)                            | -                                                                       | -                                                             | DDB0187809                                     | Q54JB8                                 |
| <i>S. cerevisiae</i><br>(budding yeast)                     | Mdm1/Yml104c<br>Nvj3/Ydr179W-a                                          | Q01846<br>Q03983                                              | Lec1/Ypr097w                                   | Q06839                                 |
| <i>S. pombe</i><br>(fission yeast)                          | snx12<br>mug122<br>pxa1                                                 | Q9USN1 (all domains)<br>O74444 (no RGS)<br>O14200 (like Nvj3) | SPCC663.15c<br>SPCC1450.12                     | O74521 (no PX)<br>Q9Y7N9 (all domains) |
| <i>C. thermophilum</i> <sup>b</sup><br>(thermophilic fungi) | CTHT_0043790/EGS19887<br>CTHT_0051170/EGS18515<br>CTHT_0024100/EGS20576 | G0S8X6 (all domains)<br>G0SDB4 (no RGS)<br>G0S5A3 (like Nvj3) | CTHT_0045050/EGS20008<br>CTHT_0057960/EGS19171 | G0S997 (no PX)<br>G0SCP5 (all domains) |
| <i>M. janaschii</i><br>(archaea)                            | -                                                                       | -                                                             | -                                              | -                                      |
| <i>P. falciparum</i><br>(protozoan)                         | -                                                                       | -                                                             | -                                              | -                                      |

- a. The DALI webserver (<http://ekhidna2.biocenter.helsinki.fi/dali/>) was used to search the AlphaFold2 database against the indicates species using either the SNX25 PXA-PXC structure or the Lec1/Ypr097w PXYn-PXYc structure.
- b. *C. thermophilum* proteins were identified via BLAST sequence searches and their domain structures were validated using ColabFold structural predictions.

**Table S3. Cavity volumes identified in LTP proteins**

| <b>Protein</b>     | <b>Largest continuous cavity volume (Å<sup>3</sup>)<sup>a</sup></b> |
|--------------------|---------------------------------------------------------------------|
| SNX13              | 2360                                                                |
| SNX14              | 2347                                                                |
| SNX19              | 3291                                                                |
| SNX25              | 3974                                                                |
| Snz                | 3830                                                                |
| Mdm1               | 2166                                                                |
| Nvj3               | 6166                                                                |
| Lec1/Ypr097w       | 15249                                                               |
| E-Syt2             | 1952                                                                |
| GLTP               | 380                                                                 |
| PC-TP START domain | 830                                                                 |
| CETP               | 1873                                                                |
| ORP1               | 425                                                                 |

- a. The cavity volumes in each structure were identified and calculated using POCASA (<http://g6altair.sci.hokudai.ac.jp/g6/service/pocasa/>)<sup>3</sup>.

**Table S4. Key Resources Table.**

| REAGENT or RESOURCE                                                           | SOURCE or REFERENCE                     | IDENTIFIER |
|-------------------------------------------------------------------------------|-----------------------------------------|------------|
| <b>Bacterial Strains</b>                                                      |                                         |            |
| <i>E. coli</i> DH5 $\alpha$                                                   | Invitrogen                              | 18265017   |
| BL21-CodonPlus (DE3)-RIL                                                      | Agilent Technologies                    | 230245     |
| <b>Mammalian cell Lines</b>                                                   |                                         |            |
| A431 (human squamous carcinoma cell line)                                     | Merck (ATCC)                            | 85090402   |
| <b>Antibodies, mammalian cell culture and imaging</b>                         |                                         |            |
| FLAG                                                                          | Sigma Aldrich                           | F7425      |
| Nile red                                                                      | Sigma Aldrich                           | 72485      |
| Donkey anti-Rabbit secondary antibody Alexa Fluor <sup>®</sup> 488 conjugate  | Life Technologies Australia             | A21206     |
| Culture dishes                                                                | Nunc                                    | 140675     |
| DMEM, high glucose, pyruvate, no glutamine                                    | Thermo Fisher Scientific Aus Pty Ltd    | 10313039   |
| Foetal bovine serum                                                           | Cytiva (Global Life Sciences Solutions) | SH30084.03 |
| Trypsin-EDTA 0.05%                                                            | Thermo Fisher Scientific Aus Pty Ltd    | 25300054   |
| lipofectamine 3000                                                            | Thermo Fisher Scientific Aus Pty Ltd    | L3000015   |
| Penicillin/Streptomycin                                                       | Thermo Fisher Scientific Aus Pty Ltd    | 15070063   |
| <b>Chemicals and enzymes</b>                                                  |                                         |            |
| Thrombin                                                                      | Sigma Aldrich                           | T6634-1KU  |
| <b>Recombinant DNA</b>                                                        |                                         |            |
| pGEX4T-2 human SNX25 RGS domain (residues 446-569; A0A494C0S0)                | This study                              | N/A        |
| pGEX4T-2 human SNX25 RGS domain (residues 446-569; A0A494C0S0) C526A mutation | This study                              | N/A        |
| pcDNA3.1+-C DYK (FLAG) human SNX25                                            | Genscript                               | NM_031953  |
| <b>Deposited Data</b>                                                         |                                         |            |
| human SNX13 AlphaFold2 model                                                  | 9, 10                                   | Q9Y5W8     |
| human SNX14 AlphaFold2 model                                                  | 9, 10                                   | Q9Y5W7     |
| human SNX19 AlphaFold2 model                                                  | 9, 10                                   | Q92543     |
| human SNX25 AlphaFold2 model                                                  | 9, 10                                   | Q9H3E2     |
| human SNX25 sequence including an N-terminal hydrophobic ER anchor sequence.  | Uniprot                                 |            |
| fly Snz AlphaFold2 model                                                      | 9, 10                                   | Q9W3N0     |
| yeast Mdm1 AlphaFold2 model                                                   | 9, 10                                   | Q01846     |
| yeast Nvj3 AlphaFold2 model                                                   | 9, 10                                   | Q03983     |
| yeast Lec1/Ypr097w AlphaFold2 model                                           | 9, 10                                   | Q06839     |
| <i>S. pombe</i> SNX14 AlphaFold2 model                                        | 9, 10                                   | Q9Y7N9     |

|                                                                                      |                   |                                                                                                                                                                                                                           |
|--------------------------------------------------------------------------------------|-------------------|---------------------------------------------------------------------------------------------------------------------------------------------------------------------------------------------------------------------------|
| <i>C. albicans</i> SNX14 AlphaFold2 model                                            | 9, 10             | A0A1D8PQ52                                                                                                                                                                                                                |
| human SNX14 PX domain crystal structure                                              | 1                 | 4PQP                                                                                                                                                                                                                      |
| human SNX14 PX domain crystal structure                                              | 1                 | 4PQO                                                                                                                                                                                                                      |
| mouse SNX19 PX domain crystal structure                                              | 1                 | 4P2I                                                                                                                                                                                                                      |
| human SNX25 PX domain NMR structure                                                  | 11                | 4PQP                                                                                                                                                                                                                      |
| human GLTP crystal structure                                                         | 6                 | 3S0K                                                                                                                                                                                                                      |
| human E-Syt2 crystal structure                                                       | 4                 | 4P42                                                                                                                                                                                                                      |
| Human phosphatidylcholine transfer protein (PC-TP) bound to phosphatidylcholine      | 7                 | 1LN2                                                                                                                                                                                                                      |
| Human CETP bound to two cholesteryl esters and two phosphatidylcholine lipids        | 5                 | 2OBD                                                                                                                                                                                                                      |
| Human OSBP-related protein 1 (ORP1) bound to phosphatidylinositol(4,5)P <sub>2</sub> | 8                 | 5ZM6                                                                                                                                                                                                                      |
| human SNX25 RGS domain (residues 283-405; Q9H3E2) crystal structure                  | This study        | 7SR1                                                                                                                                                                                                                      |
| human SNX25 RGS domain (residues 283-405; Q9H3E2) (C326A) crystal structure          | This study        | 7SR2                                                                                                                                                                                                                      |
| human RGS1 RGS domain crystal structure                                              | 12                | 2BV1                                                                                                                                                                                                                      |
| <b>Software</b>                                                                      |                   |                                                                                                                                                                                                                           |
| Coot                                                                                 | 13                | <a href="https://www2.mrc-lmb.cam.ac.uk/personal/pemsley/coot/">https://www2.mrc-lmb.cam.ac.uk/personal/pemsley/coot/</a>                                                                                                 |
| Pymol                                                                                | Schrodinger, USA. | <a href="https://pymol.org/2/">https://pymol.org/2/</a>                                                                                                                                                                   |
| AlphaFold2                                                                           | 9                 | N/A                                                                                                                                                                                                                       |
| ColabFold                                                                            | 14                | <a href="https://colab.research.google.com/github/sokrypton/ColabFold/blob/main/beta/AlphaFold2_advanced.ipynb">https://colab.research.google.com/github/sokrypton/ColabFold/blob/main/beta/AlphaFold2_advanced.ipynb</a> |
| Consurf                                                                              | 15                | <a href="https://consurf.tau.ac.il">https://consurf.tau.ac.il</a>                                                                                                                                                         |
| POCASA                                                                               | 3                 | <a href="http://g6altair.sci.hokudai.ac.jp/g6/service/pocasa/">http://g6altair.sci.hokudai.ac.jp/g6/service/pocasa/</a>                                                                                                   |
| <b>Other</b>                                                                         |                   |                                                                                                                                                                                                                           |
| HiLoad™ Superdex75 PG                                                                | GE Healthcare     | Catalogue: 28989333                                                                                                                                                                                                       |



## Supplementary References

1. Mas, C. *et al.* Structural basis for different phosphoinositide specificities of the PX domains of sorting nexins regulating G-protein signaling. *J Biol Chem* **289**, 28554-28568 (2014).
2. Datta, S., Liu, Y., Hariri, H., Bowerman, J. & Henne, W.M. Cerebellar ataxia disease-associated Snx14 promotes lipid droplet growth at ER-droplet contacts. *J Cell Biol* **218**, 1335-1351 (2019).
3. Yu, J., Zhou, Y., Tanaka, I. & Yao, M. Roll: a new algorithm for the detection of protein pockets and cavities with a rolling probe sphere. *Bioinformatics* **26**, 46-52 (2010).
4. Schauder, C.M. *et al.* Structure of a lipid-bound extended synaptotagmin indicates a role in lipid transfer. *Nature* **510**, 552-555 (2014).
5. Qiu, X. *et al.* Crystal structure of cholesteryl ester transfer protein reveals a long tunnel and four bound lipid molecules. *Nat Struct Mol Biol* **14**, 106-113 (2007).
6. Samygina, V.R. *et al.* Enhanced selectivity for sulfatide by engineered human glycolipid transfer protein. *Structure* **19**, 1644-1654 (2011).
7. Roderick, S.L. *et al.* Structure of human phosphatidylcholine transfer protein in complex with its ligand. *Nat Struct Biol* **9**, 507-511 (2002).
8. Dong, J. *et al.* Allosteric enhancement of ORP1-mediated cholesterol transport by PI(4,5)P2/PI(3,4)P2. *Nat Commun* **10**, 829 (2019).
9. Jumper, J. *et al.* Highly accurate protein structure prediction with AlphaFold. *Nature* **596**, 583-589 (2021).
10. Tunyasuvunakool, K. *et al.* Highly accurate protein structure prediction for the human proteome. *Nature* **596**, 590-596 (2021).
11. Chandra, M. *et al.* Classification of the human phox homology (PX) domains based on their phosphoinositide binding specificities. *Nat Commun* **10**, 1528 (2019).
12. Soundararajan, M. *et al.* Structural diversity in the RGS domain and its interaction with heterotrimeric G protein alpha-subunits. *Proc Natl Acad Sci U S A* **105**, 6457-6462 (2008).
13. Emsley, P. & Cowtan, K. Coot: model-building tools for molecular graphics. *Acta Crystallogr D Biol Crystallogr* **60**, 2126-2132 (2004).
14. Mirdita, M., Ovchinnikov, S. & Steinegger, M. ColabFold - Making protein folding accessible to all. . *bioRxiv* (2021).
15. Ashkenazy, H. *et al.* ConSurf 2016: an improved methodology to estimate and visualize evolutionary conservation in macromolecules. *Nucleic Acids Res* **44**, W344-350 (2016).

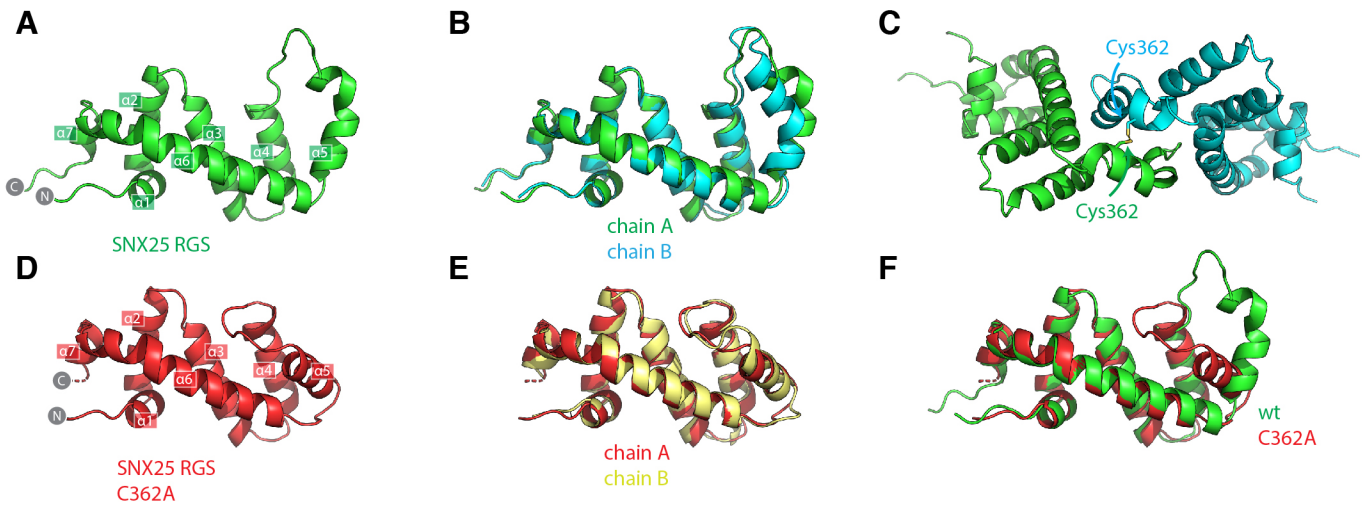

Figure S1. Crystal structure of the SNX25 RGS domain.

(A) Crystal structure of the wild-type human SNX25 RGS domain. (B) Alignment of the two chains in the asymmetric unit of wild-type SNX25 RGS domain. (C) The position of the non-native disulfide bond formed between adjacent chains in the crystal lattice. This causes the change in orientation of the  $\alpha 5$  helix. (D) Crystal structure of the SNX25(C526A) mutant protein. (E) Alignment of the two chains in the asymmetric unit of SNX25(C526A) RGS domain. (F) Structural alignment of the wild-type and C526A SNX25 RGS domain structures.

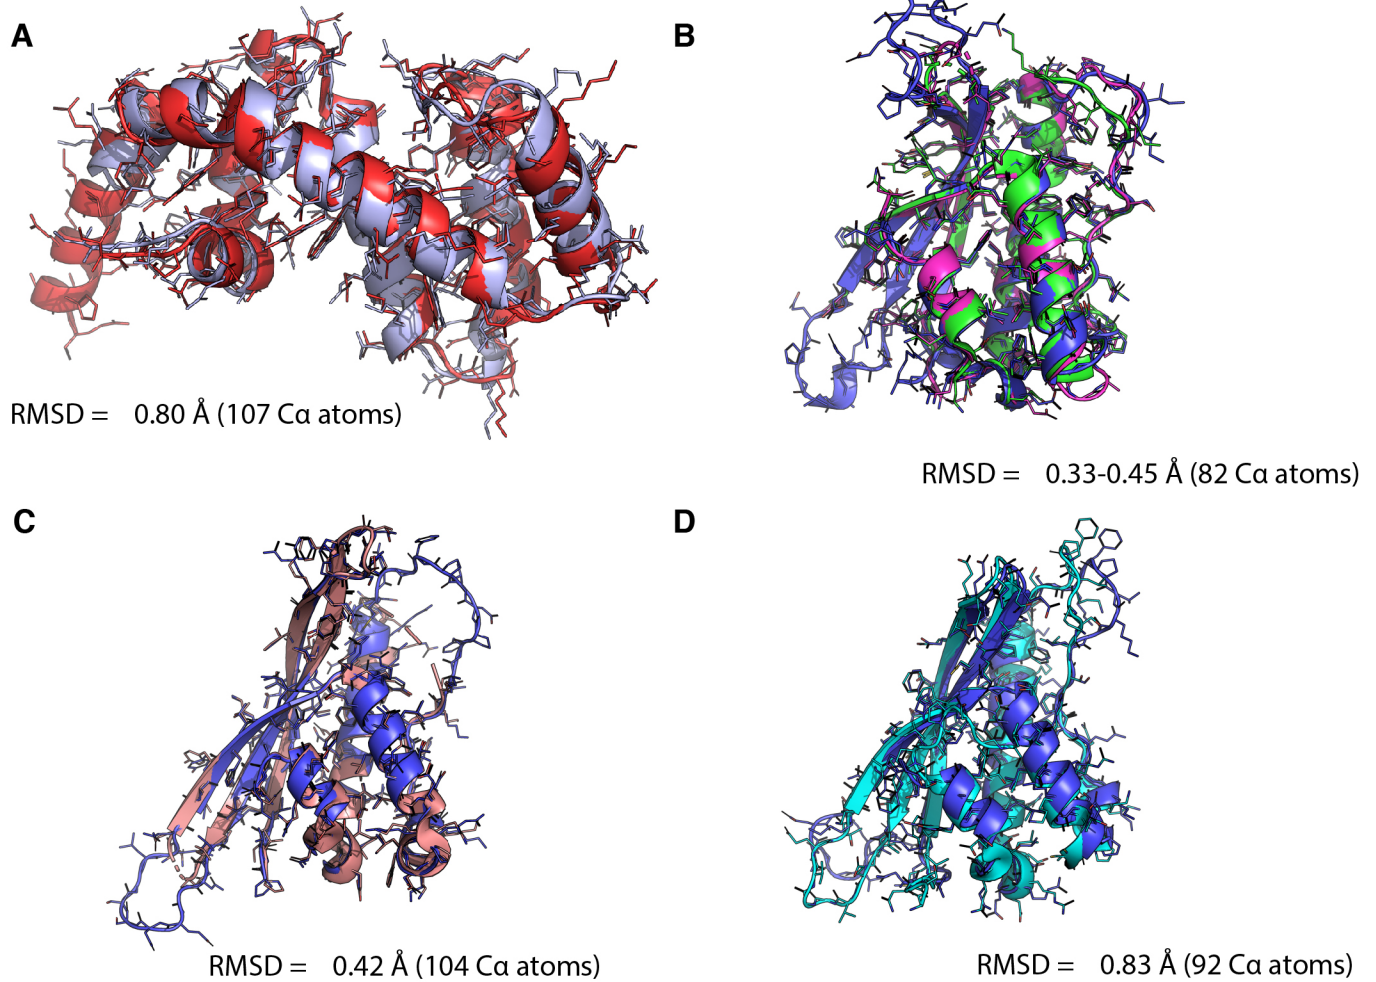

Figure S2. Comparison of experimental SNX-RGS structures with their AlphaFold2 predictions. (A) Crystal structure of the human SNX25(C326A) RGS domain (red, this study) aligned with the AlphaFold2 prediction (light blue). (B) Crystal structures of human SNX14 PX domain (green, PDB 4PQP; magenta, 4PQO) with the AlphaFold2 prediction (blue). (C) Crystal structure of mouse SNX19 PX domain (pink, PDB 4P2I) aligned with the AlphaFold2 prediction (blue). (D) NMR structure of human SNX25 PX domain (cyan, PDB 4PQP) aligned with the AlphaFold2 prediction (blue).

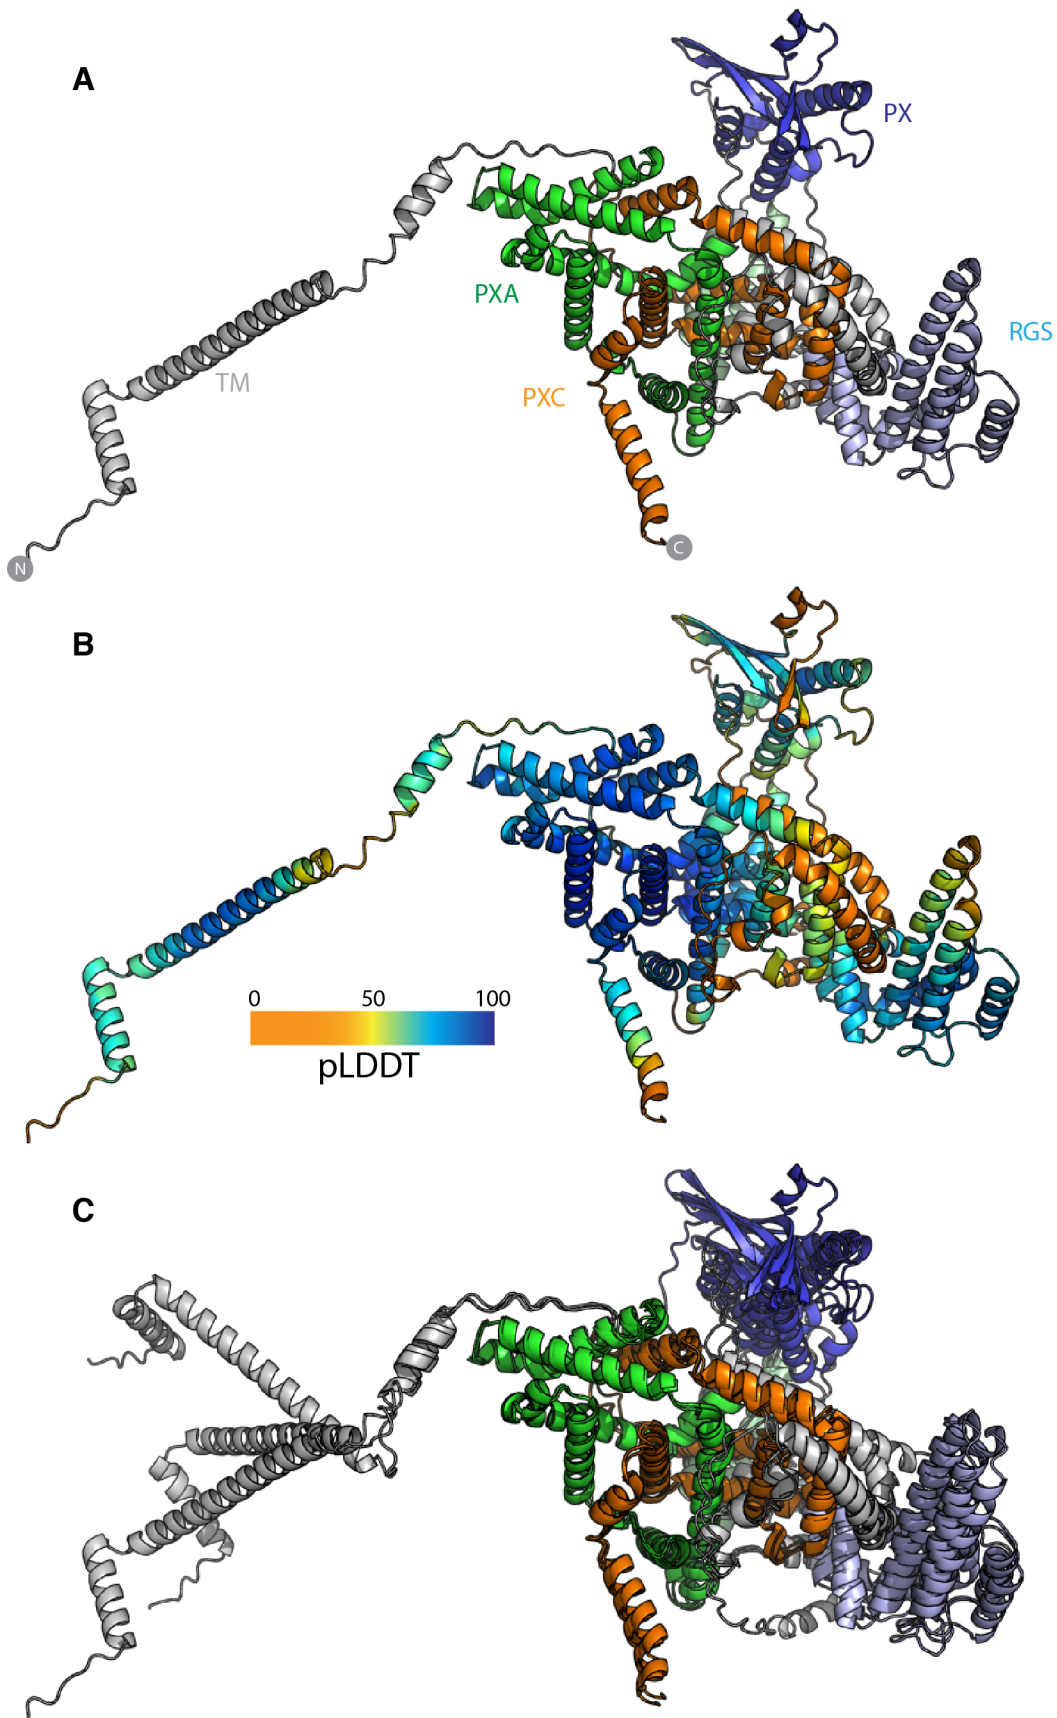

Figure S3. Additional details of the SNX13 predicted full length structure.

(A) AlphaFold2 prediction of full-length human SNX13 protein with individual domains coloured as in Fig. 2B with the TM domain and linker regions (grey), PXA domain (green), RGS domain (light blue), PX domain (blue), and PXC domain (orange). (B) AlphaFold2 prediction of full-length human SNX13 protein coloured according to the pLDDT score. (C) The AlphaFold2 predictions of human, mouse and zebrafish SNX13 proteins were aligned based on the core PXA-PXC structure.

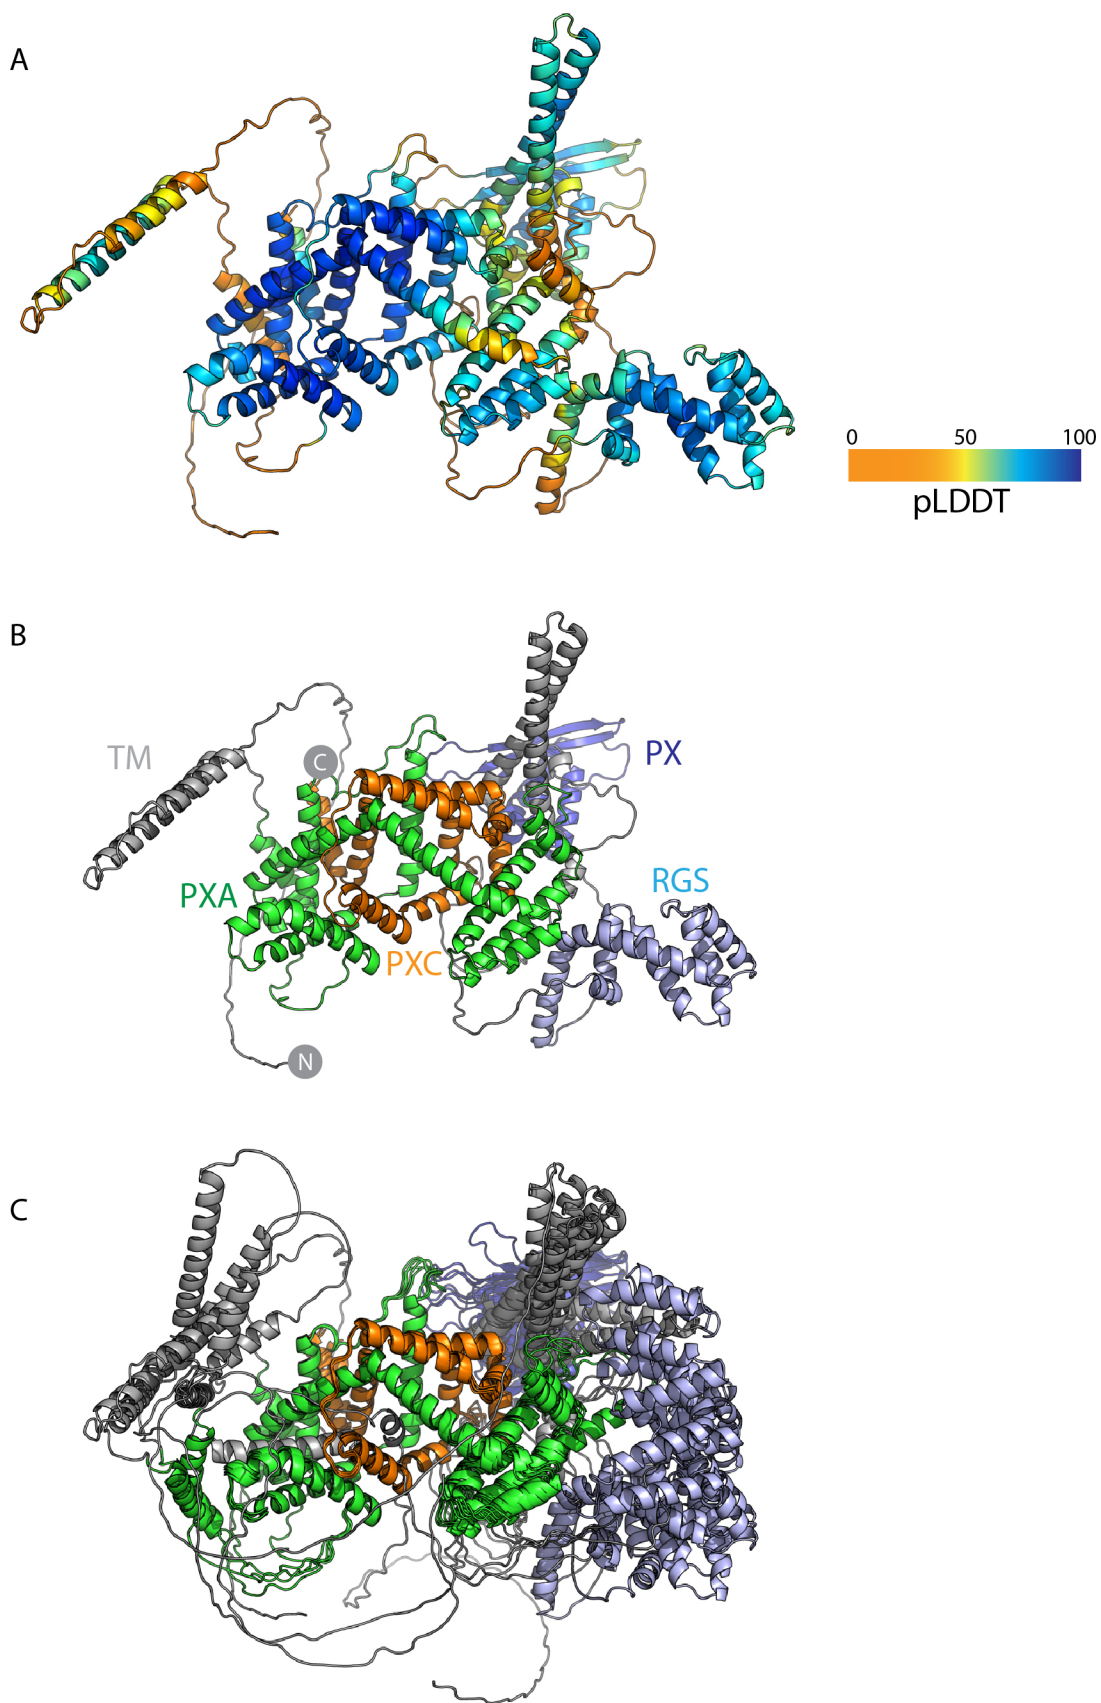

Figure S4. AlphaFold2 prediction of full-length human SNX25 protein.  
 (A) Top ranked structure of full length human SNX25 5 (Uniprot ID A0A494C0S0) predicted by ColabFold coloured according to pLDDT score. (B) Top ranked structure of human SNX25 predicted by ColabFold coloured according to the indicated domains. (C) Alignment based on the core PXA-PXC structure of the five structural predictions of human SNX25 from ColabFold.

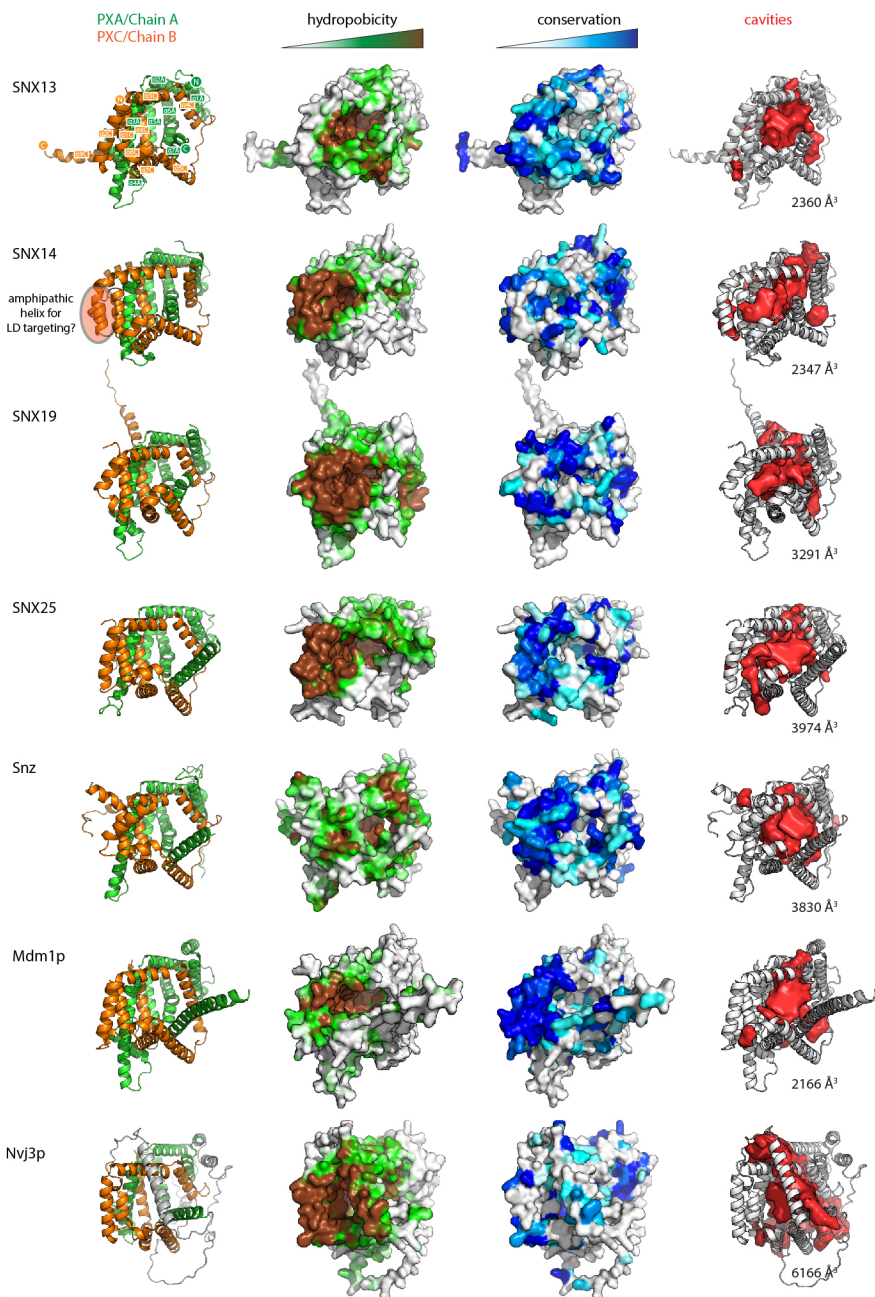

Figure S5. Conserved hydrophobic cavities in all human, yeast and fly PXA-PXC domains.

Structures of indicated PXA-PXC domains in ribbon (left) surface coloured by hydrophobicity, and sequence conservation. A region in SNX14 is highlighted that when deleted prevents LD recruitment 7. Far right panels display accessible cavities (red surface representation) in the proteins identified with POCASA56 and the volume (Å<sup>3</sup>) of the largest identified cavity is indicated. The five bottom structures are examples of other lipid transfer proteins bound to different lipids, demonstrating how similar kinds of conserved hydrophobic pockets can serve as lipid binding cavities and provided for comparison. Extended synaptotagmin 2 (E-Syt2) is in complex with a phosphatidylethanolamine lipid and Triton-X100 detergent molecule (PDB 4P42) 57. Cholesteryl ester transfer protein (CETP) is in complex with two cholesteryl esters and two phosphatidylcholine lipids (PDB 2OBP) 35. Glycolipid transfer protein (GLTP) is in complex with N-oleoyl-glucosylceramide (PDB 3S0K) 58. Phosphatidylcholine transfer protein (PC-TP) is shown in complex with a phosphatidylcholine molecule (PDB 1LN2) 59. Human OSBP-related protein 1 (ORP1) is shown bound to phosphatidylinositol(4,5)P2 (PDB 5ZM6)60

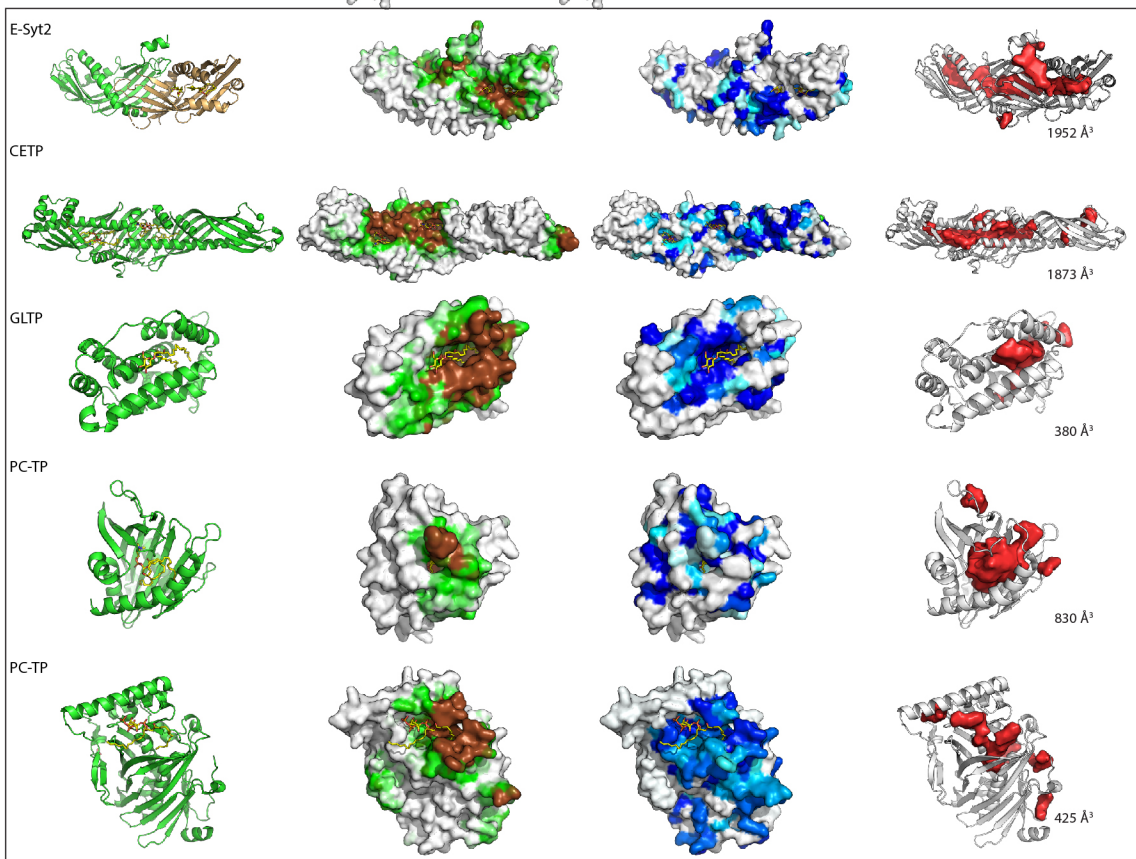

**A**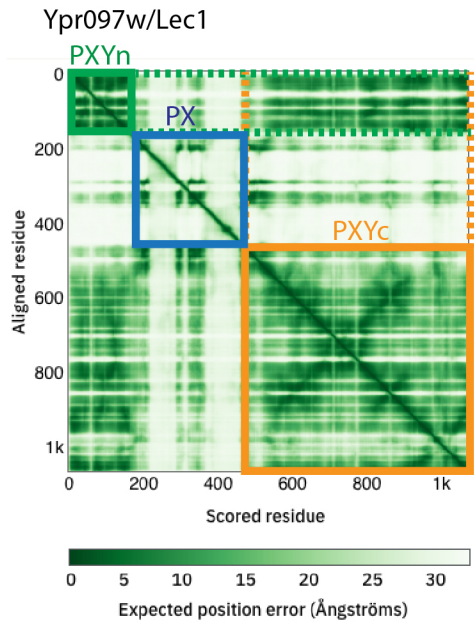**B**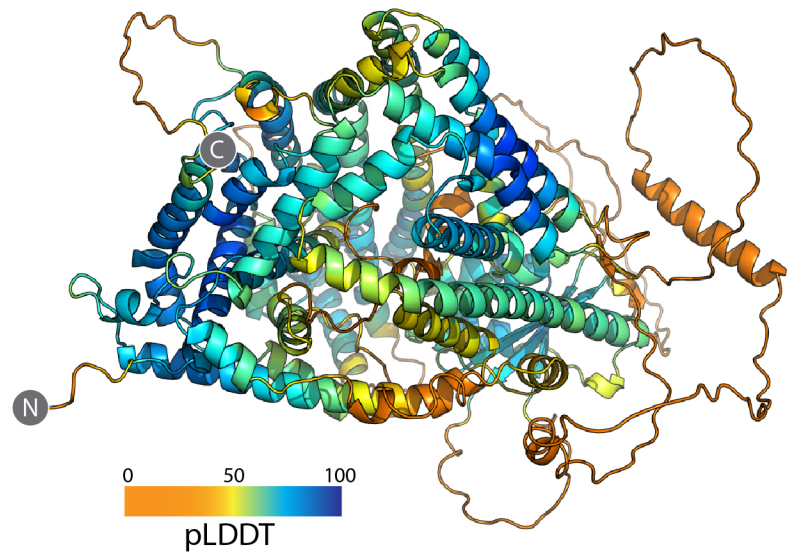**C**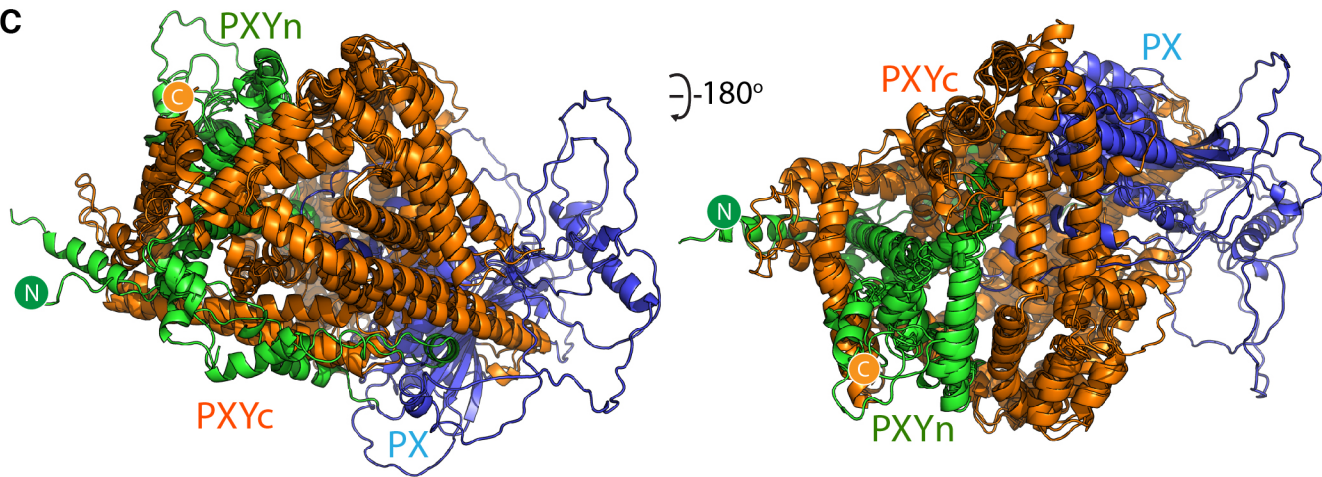

Figure S6. AlphaFold2 predicted structure of Lec1/Ypr097w.

(A) Plot of the Predicted Alignment Error (PAE) from the AlphaFold2 database. There is a strong degree of correlation between the N-terminal PXYn and C-terminal PXYc domains suggesting these two domains are physically associated. (B) The predicted structure of Lec1/Ypr097w from *S. cerevisiae* coloured according to the pLDDT score. (C) Overlay of the PXY proteins from *S. cerevisiae*, *S. pombe* and *C. albicans*.

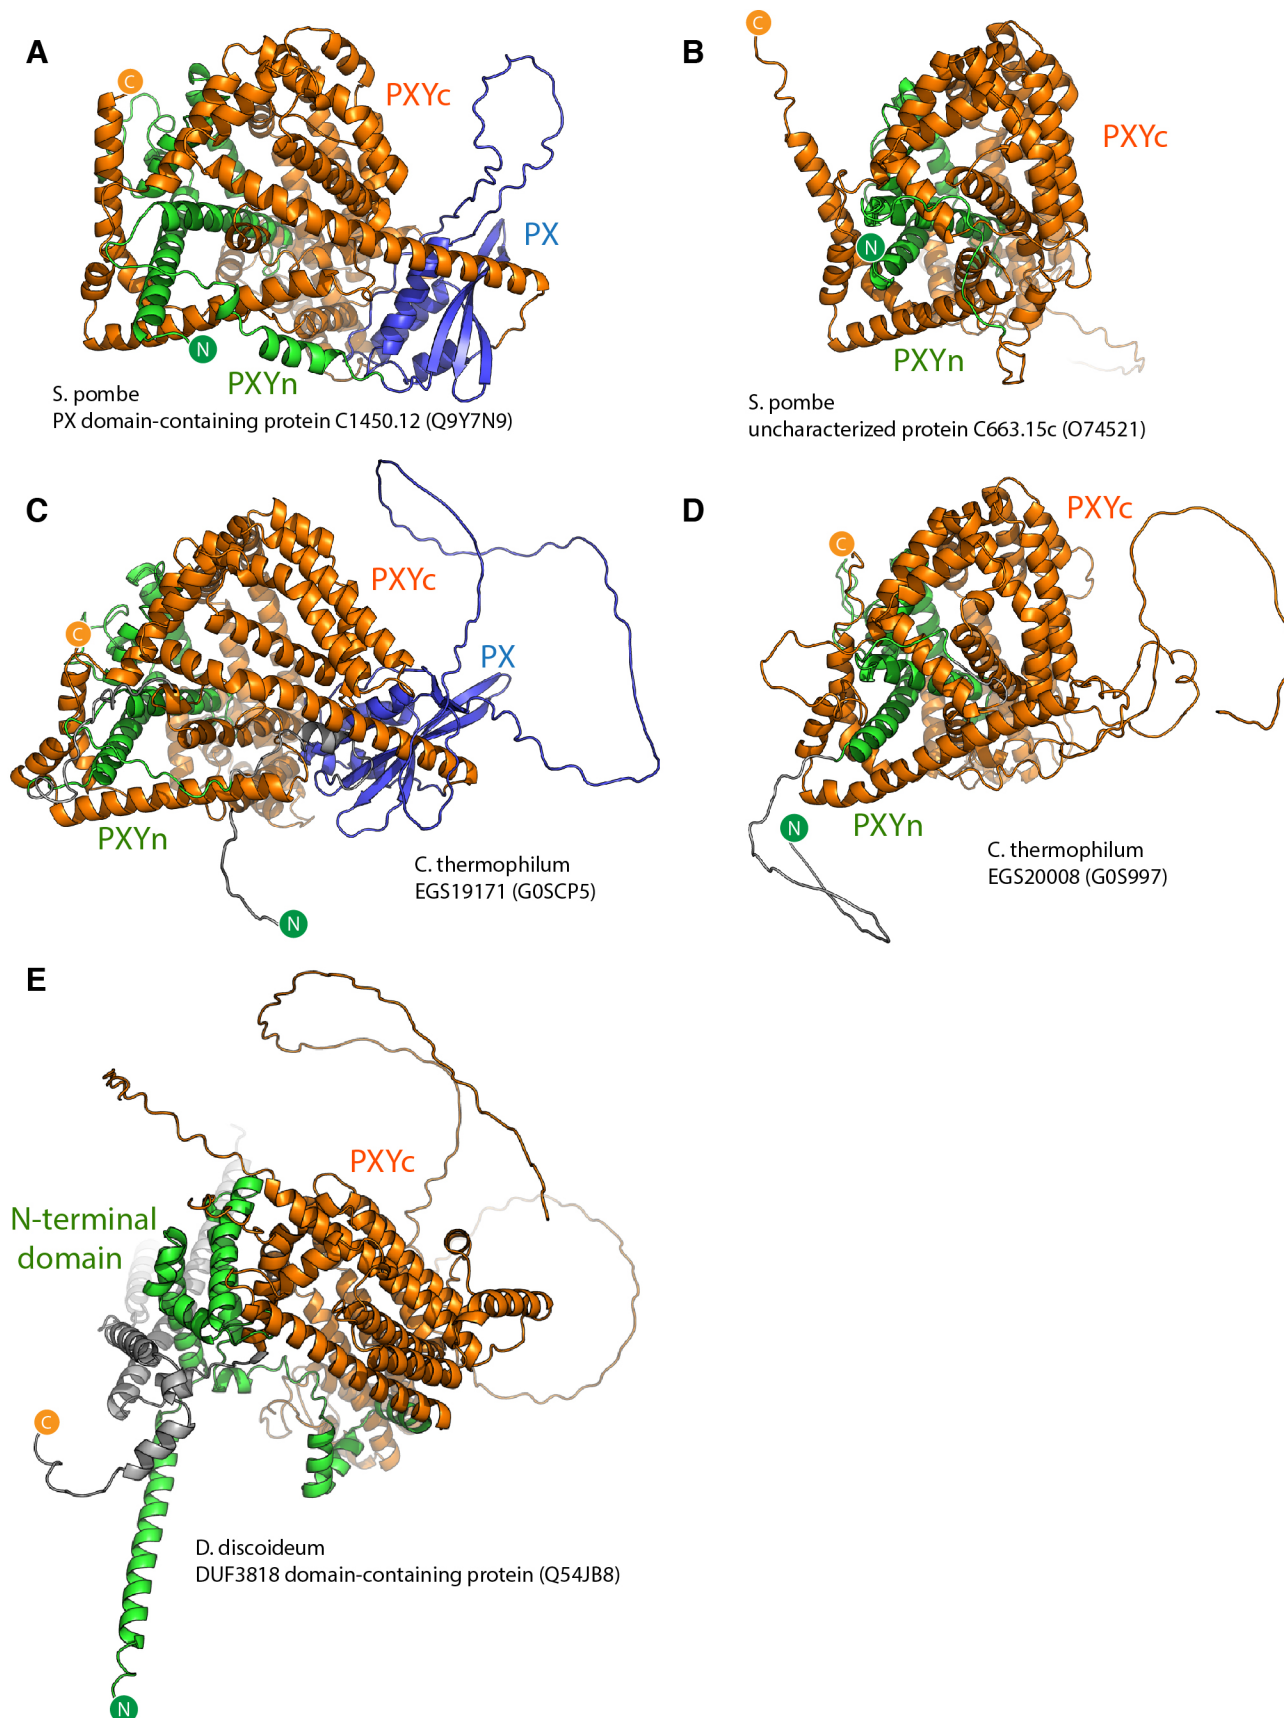

Figure S7. AlphaFold2 predicted structure of PXY domain proteins found in *S. pombe*, *C. thermophilum* and *D. dictyostelium*. (A) Structural prediction of *S. pombe* Lec1/Ypr092w orthologue C1450.12. (B) Structural prediction of *S. pombe* Lec1/Ypr092w homologue C663.15c. (C) Structural prediction of *C. thermophilum* Lec1/Ypr092w orthologue EGS19171. (D) Structural prediction of *C. thermophilum* Lec1/Ypr092w homologue EGS20008. (E) Structural prediction of *D. discoideum* DUF3818 domain-containing protein.
